# Supplementary material
Source: PubMed Central journal article supplement (PMC9338041)
Supplement: 42003_2022_3710_MOESM2_ESM.pdf [file 42003_2022_3710_MOESM2_ESM.pdf]

1  
2  
3  
4  
5  
6  
7  
8  
9  
10  
11  
12  
13  
14  
15  
16  
17  
18  
19  
20  
21  
22  
23  
24  
25  
26  
27  
28  
29

**Supplementary Material for**  
**“Metabolic signatures in human follicular fluid identify**  
**lysophosphatidylcholine as a predictor of follicular development”**

Jihong Yang<sup>1</sup>, Yangbai Li<sup>1</sup>, Suying Li<sup>1</sup>, Yan Zhang<sup>1</sup>, Ruizhi Feng<sup>2,3</sup>, Rui Huang<sup>4</sup>,  
Minjian Chen<sup>4,5\*</sup> and Yun Qian<sup>1\*</sup>

<sup>1</sup> Reproductive Medical Center of Second Affiliated Hospital of Nanjing Medical University, Nanjing 210011, China.

<sup>2</sup> State Key Laboratory of Reproductive Medicine, Nanjing Medical University, Nanjing 211166, China.

<sup>3</sup> The Second Affiliated Hospital of Nanjing Medical University, Nanjing 210011, China.

<sup>4</sup> Key Laboratory of Modern Toxicology of Ministry of Education, School of Public Health, Nanjing Medical University, Nanjing 211166, China.

<sup>5</sup> State Key Laboratory of Reproductive Medicine, Center for Global Health, School of Public Health, Nanjing Medical University, Nanjing 211166, China.

\* Corresponding author. These authors jointly supervised this work.  
To whom correspondence: E-mail: [minjianchen@njmu.edu.cn](mailto:minjianchen@njmu.edu.cn); [qianyun@njmu.edu.cn](mailto:qianyun@njmu.edu.cn)

30 **Supplementary Figures:**

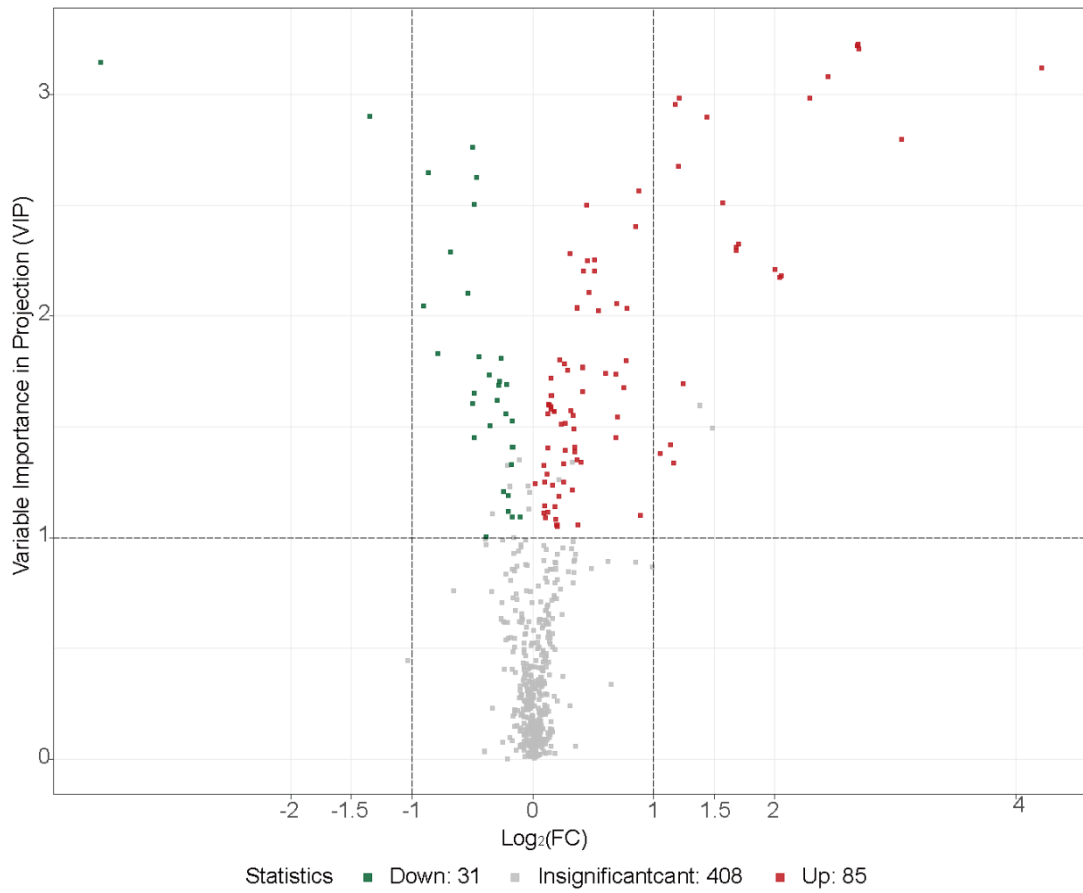

31

32 **Supplementary Figure 1. Volcano plot of 116 differential metabolites.** The 116  
33 metabolites with fold change  $\geq 2$  or  $\leq 0.5$ , VIP > 1, and  $p < 0.05$  were identified.

34

35

36

37

38

39

40

41

42

43

44

45

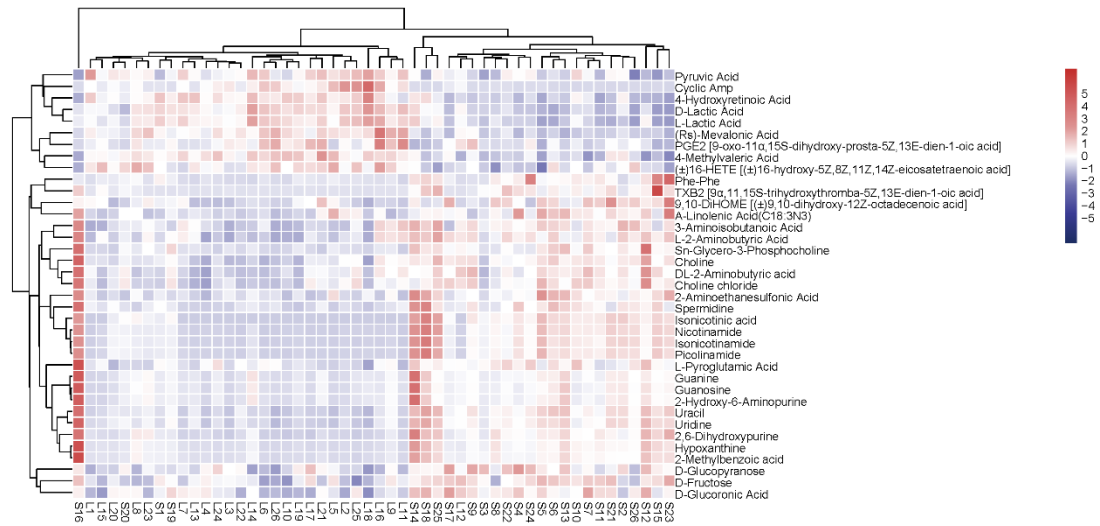

46

47 **Supplementary Figure 2. Heatmap of 37 differential metabolites.** Among the 116  
 48 differential metabolites, 37 metabolites with  $p < 0.03$  and  $VIP \geq 2$  were selected for  
 49 heatmap display.

50

51

52

53

54

55

56

57

58

59

60

61

62

63

KEGG Classification

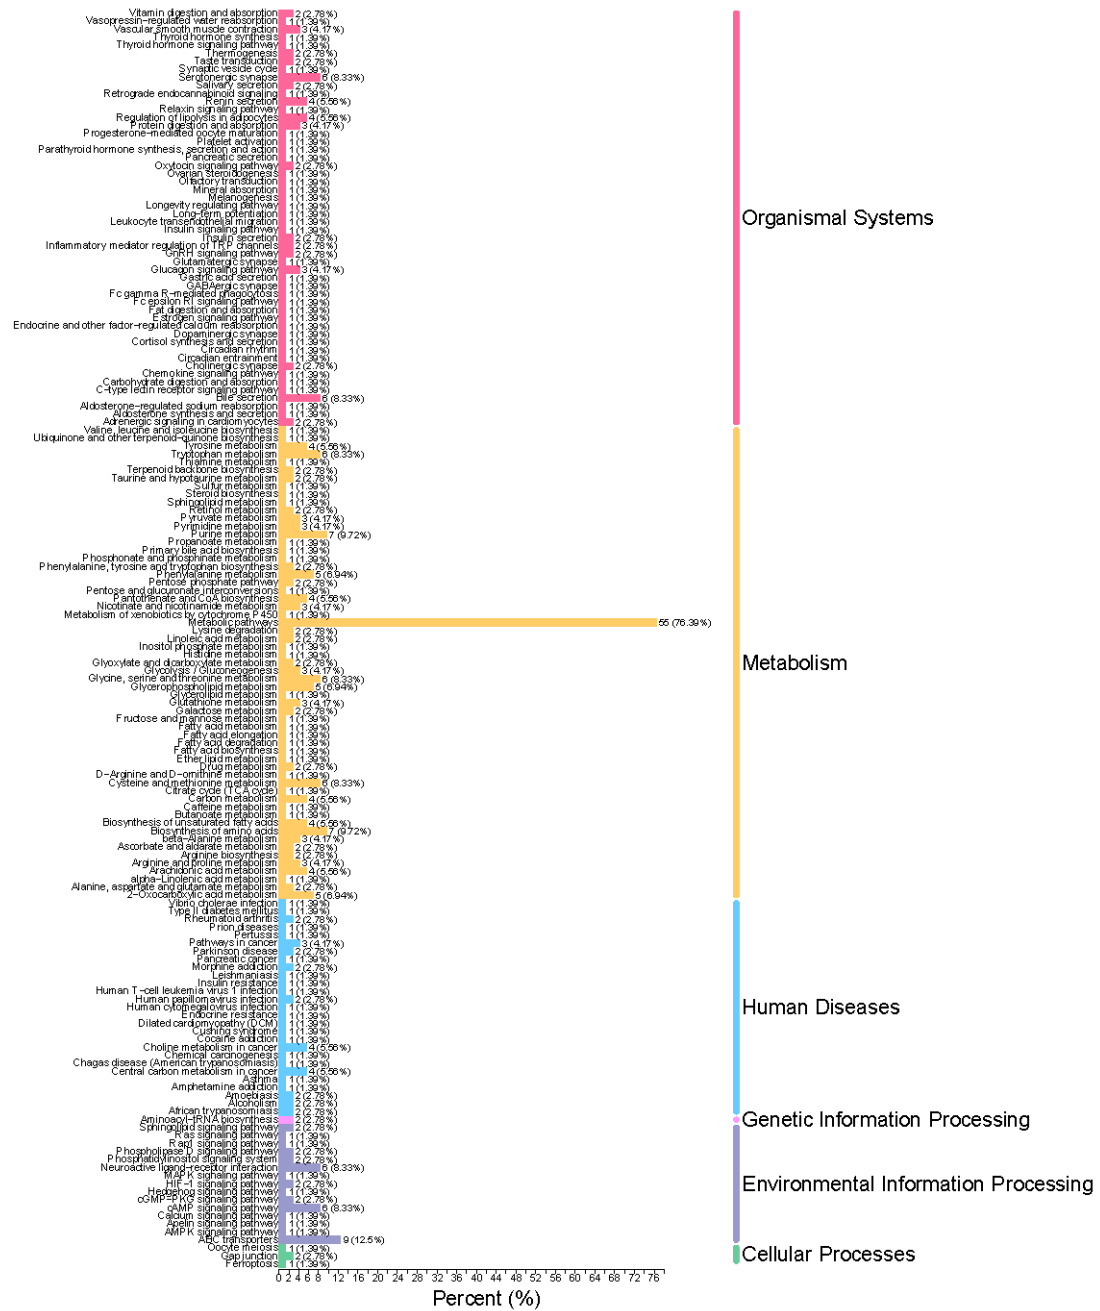

64

65 **Supplementary Figure 3. KEGG classification of differential metabolites based on**  
 66 **pathway types.**

67

68

69

70

71

72

73 **Supplementary Table 1 Clinical epidemiological information for participants who provided the FF**  
 74 **sample (N = 26).**

| <b>Characteristics</b>                         | <b>Values</b>    |
|------------------------------------------------|------------------|
| Age (year)                                     | 29.50 ± 0.62     |
| BMI                                            | 21.21 ± 0.38     |
| Percentage of infertility type (%)             |                  |
| Primary infertility                            | 57.69            |
| Secondary infertility                          | 42.31            |
| Basal E2 (pg/ml)                               | 50.99 ± 4.48     |
| Basal LH (mIU/ml)                              | 4.51 ± 0.33      |
| Basal FSH (mIU/ml)                             | 8.24 ± 0.69      |
| AMH (ng/ml)                                    | 4.18 ± 0.49      |
| AFC                                            | 15.38 ± 1.01     |
| Gn dose (IU)                                   | 2336.54 ± 107.90 |
| Gn duration (days)                             | 9.81 ± 0.36      |
| E2 level on the trigger day (pmol/L)           | 4136.54 ± 353.29 |
| Progesterone level on the trigger day (nmol/L) | 0.98 ± 0.10      |
| LH level on the trigger day (IU/L)             | 1.09 ± 0.12      |
| No. of oocytes retrieved                       | 13.27 ± 1.24     |
| Oocyte maturation rate (%)                     | 77.05 ± 3.35     |
| Fertilization rate (%)                         | 78.42 ± 3.02     |
| Cleavage rate (%)                              | 98.84 ± 2.30     |
| High-quality embryo rate (%)                   | 31.53 ± 4.83     |
| Biochemical pregnancy rate (%)                 | 65.33 ± 8.90     |
| Clinical pregnancy rate (%)                    | 53.33 ± 9.39     |

75 Data are presented as mean values and standard error of the mean.

76 For one participant, oocyte maturation rate = number of oocytes at MII (metaphase II oocytes, 1st polar body) stage/ total  
 77 number of oocytes retrieved.

78 Fertilization rate = number of fertilized embryos/total number of oocytes retrieved.

79 Cleavage rate = number of cleavage embryos/number of 2PN.

80 High-quality embryo rate = number of high-quality embryos (grade I and II embryos)/number of 2PN.

81 Biochemical pregnancy rate refers to the cumulative biochemical pregnancy rate in the oocyte cycle during which the samples  
 82 were collected, that is, the number of biochemical pregnancies of the participant/the number of embryos transplanted in this  
 83 cycle.

84 Clinical pregnancy rate refers to the cumulative clinical pregnancy rate in the oocyte cycle during which the samples were  
 85 collected, that is, the number of clinical pregnancies of the participant/the number of embryos transplanted in this cycle.

86

87

88 **Supplementary Table 2 General information of participants' male spouses (N = 26).**

| <b>Characteristics</b>                | <b>Values</b>  |
|---------------------------------------|----------------|
| Age (year)                            | 30.83 ± 0.74   |
| BMI                                   | 24.71 ± 0.58   |
| Semen volume (ml)                     | 3.84 ± 0.33    |
| Sperm density (* 10 <sup>6</sup> /ml) | 144.11 ± 22.53 |
| Sperm motility (%)                    | 80.83 ± 1.52   |
| Sperm deformity (%)                   | 83.08 ± 0.68   |
| Sperm fragmentation rate (%)          | 15.83 ± 2.68   |

89 Data are presented as mean values and standard error of the mean.

90

91

92

93

94

95

96

97

98

99

100

101

102

103

104

105

106

107

108

109

110

111

112

113

**Supplementary Table 3 Pathway analysis of the 116 differential metabolites.**

| <b>Pathway</b>                           | <b>Total</b> | <b>Impact</b> | <b>P</b> | <b>Metabolites</b>                                                               |
|------------------------------------------|--------------|---------------|----------|----------------------------------------------------------------------------------|
| Purine metabolism                        | 65           | 0.045         | 0.021    | Xanthine; 3',5'-Cyclic AMP; Adenosine; Hypoxanthine; Inosine; Guanine; Guanosine |
| Pantothenate and CoA biosynthesis        | 19           | 0.043         | 0.047    | Pantetheine; L-Aspartate; Uracil                                                 |
| Glycine, serine and threonine metabolism | 33           | 0.073         | 0.053    | Choline; N,N-Dimethylglycine; L-Cystathionine; Pyruvate                          |
| beta-Alanine metabolism                  | 21           | 0             | 0.061    | L-Aspartate; Uracil; Spermidine                                                  |
| Phenylalanine metabolism                 | 10           | 0.595         | 0.068    | L-Phenylalanine; Phenethylamine                                                  |
| Pyruvate metabolism                      | 22           | 0.291         | 0.068    | (R)-Lactate; Pyruvate; (S)-Lactate                                               |
| Glycerophospholipid metabolism           | 36           | 0.098         | 0.069    | Choline; Acetylcholine; Ethanolamine phosphate; sn-Glycero-3-phosphocholine      |

114

Note: The pathways with  $p < 0.10$  were included.

115

116

117

118

119

120

121

122

123

124

125

126

127

128

129

130

131

132

133

134

135 **Supplementary Table 4 General information of participants' male spouses (N = 200).**

| <b>Characteristics</b>                | <b>Values</b> |
|---------------------------------------|---------------|
| Age (year)                            | 33.78 ± 0.45  |
| BMI                                   | 25.29 ± 0.23  |
| Semen volume (ml)                     | 3.40 ± 0.11   |
| Sperm density (* 10 <sup>6</sup> /ml) | 107.44 ± 5.25 |
| Sperm motility (%)                    | 80.02 ± 0.64  |
| Sperm deformity (%)                   | 83.02 ± 0.17  |
| Sperm fragmentation rate (%)          | 13.64 ± 0.89  |

136 Data are presented as mean values and standard error of the mean.

137

138

139

140

141

142

143

144

145

146

147

148

149

150

151

152

153

154

155

156

157



158 **Supplementary Table 5 IVF indicators and pregnancy outcomes divided by serum LPC tertiles.**

| <b>Characteristics</b>         | <b>Group 1 (N = 60)</b> | <b>Group 2 (N = 74)</b> | <b>Group 3 (N = 66)</b> | <b>P</b> |
|--------------------------------|-------------------------|-------------------------|-------------------------|----------|
| LPC in serum (pg/ml)           | <150                    | 150-250                 | >250                    |          |
| Number of oocytes retrieved    | 10.17                   | 11.24                   | 11.17                   | 0.702    |
| Fertilization rate (%)         | 73.89                   | 78.64                   | 76.35                   | 0.476    |
| Cleavage rate (%)              | 97.95                   | 98.85                   | 98.31                   | 0.641    |
| Transplantable embryo rate (%) | 65.36                   | 64.63                   | 65.06                   | 0.989    |
| Biochemical pregnancy rate (%) | 60.88                   | 53.50                   | 63.60                   | 0.421    |
| Clinical pregnancy rate (%)    | 53.74                   | 43.72                   | 55.12                   | 0.301    |

159 One-way ANOVA was used to analyze differences among three groups divided by tertiles.

160

161

162

163

164

165

166

167

168

169

170

171

172

173

174

175

176

177

178

179

180

181

182

**Supplementary Table 6 IVF indicators and pregnancy outcomes divided by FF LPC tertiles.**

| <b>Characteristics</b>         | <b>Group 1 (N =<br/>69)</b> | <b>Group 2 (N =<br/>74)</b> | <b>Group 3 (N =<br/>57)</b> | <b>P</b> |
|--------------------------------|-----------------------------|-----------------------------|-----------------------------|----------|
| LPC in FF (pg/ml)              | <180                        | 180-280                     | >280                        |          |
| Number of oocytes retrieved    | 10.19                       | 11.81                       | 10.56                       | 0.450    |
| Fertilization rate (%)         | 77.23                       | 75.23                       | 77.11                       | 0.839    |
| Cleavage rate (%)              | 98.17                       | 98.73                       | 98.40                       | 0.842    |
| Transplantable embryo rate (%) | 66.26                       | 65.36                       | 63.17                       | 0.846    |
| Biochemical pregnancy rate (%) | 59.48                       | 56.88                       | 57.81                       | 0.948    |
| Clinical pregnancy rate (%)    | 54.60                       | 44.69                       | 52.95                       | 0.420    |

183

One-way ANOVA was used to analyze differences among three groups divided by tertiles.
