# Supplementary material
Source: PubMed Central journal article supplement (PMC9338041)
Supplement: 42003_2022_3710_MOESM3_ESM.pdf [file 42003_2022_3710_MOESM3_ESM.pdf]

## Description of Additional Supplementary Files

**File name:** Supplementary Data 1

**Description:** Metabolomic analysis based on the coverage of a wide range of targeted metabolomics.
